# Supplementary material for: New insights into the role of Cutibacterium acnes-derived extracellular vesicles in inflammatory skin disorders
Source: PubMed Central journal article supplement (PMC10520063; doi:10.1038/s41598-023-43354-w), 2023-09-25
Supplement: 41598_2023_43354_MOESM1_ESM.pdf [file 41598_2023_43354_MOESM1_ESM.pdf]

## SUPPORTING INFORMATION

**Table S1. List of proteins identified exclusively in *C. acnes*-derived A1 EVs under anaerobic conditions**

| Gene name                  | Accession number | Protein name                                       | GO - Biological process | GO - Molecular function      | GO - Cellular component |
|----------------------------|------------------|----------------------------------------------------|-------------------------|------------------------------|-------------------------|
| pyrK PPA1001<br>cbac_05440 | WP_002517886.1   | Dihydroorotate dehydrogenase B                     | Biosynthetic process    | Binding                      | Membrane                |
| cbac_03745                 | WP_073842171.1   | PTS sugar transporter                              | Transport               | Transferase activity         | Membrane                |
| PPA1099 cbac_05960         | WP_002514993.1   | PAC2 family protein                                | Protein processing      | Unknown                      | Cytoplasm               |
| pyrD cbac_05445            | WP_002517834.1   | Dihydroorotate dehydrogenase                       | Biosynthetic process    | Dehydrogenase activity       | Cytoplasm               |
| PPA2168 cbac_11750         | WP_002516248.1   | Formimidoylglutamate deiminase                     | Metabolic process       | Peptidase activity           | Cytoplasm               |
| cbac_02600                 | WP_002531152.1   | Copper homeostasis protein CutC                    | Cellular homeostasis    | Binding                      | Unknown                 |
| folP PPA0271<br>cbac_01520 | WP_002517047.1   | Dihydropteroate synthase                           | Biosynthetic process    | Binding                      | Cytoplasm               |
| PPA0313 cbac_01745         | WP_002517195.1   | NAD-dependent malic enzyme                         | Metabolic process       | Dehydrogenase activity       | Cytoplasm               |
| hisF<br>HMPREF0675_4424    | WP_002516482.1   | Imidazole glycerol phosphate synthase subunit HisF | Biosynthetic process    | Lyase activity               | Cytoplasm               |
| PPA0464 cbac_02555         | WP_002530084.1   | Sugar phosphate isomerase/epimerase                | Biosynthetic process    | Isomerase activity           | Membrane                |
| PPA0464 cbac_02555         | WP_002530084.1   | Sugar phosphate isomerase/epimerase                | Biosynthetic process    | Isomerase activity           | Cytoplasm               |
| PPA1005 cbac_05460         | WP_002515547.1   | Fructosamine kinase                                | Protein processing      | Kinase activity              | Cytoplasm               |
| cbac_02675                 | WP_002518785.1   | Phosphoserine transaminase                         | Biosynthetic process    | Transferase activity         | Cytoplasm               |
| ddl cbac_12720             | WP_002515704.1   | D-alanine--D-alanine ligase                        | Cell wall organization  | Binding                      | Cytoplasm               |
| thiE cbac_04840            | WP_002531442.1   | Thiamine-phosphate synthase                        | Biosynthetic process    | Binding                      | Cytoplasm               |
| PPA0303 cbac_01695         | WP_002531197.1   | Uroporphyrinogen-III synthase                      | Biosynthetic process    | Synthase activity            | Cytoplasm               |
| HMPREF0675_4140            | WP_002515011.1   | Histidine triad domain protein                     | Transport               | Catalytic activity           | Membrane                |
| cobM PPA0421<br>cbac_02310 | WP_002515099.1   | Precorrin-4 C                                      | Biosynthetic process    | Transferase activity         | Unknown                 |
| hutI<br>HMPREF0675_5232    | WP_002516336.1   | Imidazolonepropionate                              | Metabolic process       | Binding                      | Cytoplasm               |
| PPA1225 cbac_06630         | WP_002524933.1   | Pyridoxal kinase                                   | Biosynthetic process    | Kinase activity              | Cytoplasm               |
| PPA1015 cbac_05515         | WP_002515534.1   | Aldose epimerase                                   | Metabolic process       | Binding                      | Membrane                |
| PPA1982 cbac_10760         | WP_002530665.1   | Phosphatase PAP2 family protein                    | Lipid metabolism        | Phosphatase activity         | Membrane                |
| PPA0525 cbac_02915         | WP_002516665.1   | DNase                                              | Degradation             | Hydrolase activity           | Cytoplasm               |
| PPA1009 cbac_05480         | WP_002513709.1   | Possible transcriptional regulator                 | Transcription           | Molecular function regulator | Cytoplasm               |
| PPA1629 cbac_08845         | WP_002517032.1   | 6-phosphogluconate dehydrogenase, decarboxylating  | Metabolic process       | Dehydrogenase activity       | Cytoplasm               |
| PPA2286 cbac_12435         | WP_002515771.1   | Phosphoglucomutase                                 | Metabolic process       | Transferase activity         | Cytoplasm               |
| PPA0106 cbac_00580         | WP_002512819.1   | ABC transporter substrate-binding protein          | Transport               | Binding                      | Membrane                |
| tsaB PPA1784<br>cbac_09710 | WP_002531267.1   | Peptidase, family M22                              | Translation             | Transferase activity         | Membrane                |
| tsaB PPA1784<br>cbac_09710 | WP_002531267.1   | Peptidase, family M22                              | Translation             | Transferase activity         | Cytoplasm               |
| idi cbac_11445             | WP_002530756.1   | Isopentenyl-diphosphate Delta-isomerase            | Biosynthetic process    | Hydrolase activity           | Cytoplasm               |
| PPA2156 cbac_11695         | WP_002530776.1   | Dipeptide ABC transporter ATP-binding protein      | Transport               | Transporter activity         | Membrane                |
| murQ<br>HMPREF9578_00165   | WP_002513573.1   | N-acetylmuramic acid 6-phosphate etherase          | Metabolic process       | Lyase activity               | Cytoplasm               |
| PPA2214 cbac_12030         | WP_002530902.1   | Electron transfer flavoprotein subunit alpha       | Metabolic process       | Transferase activity         | Unknown                 |
| HMPREF9206_1221            | WP_002512973.1   | Phosphoglycerate mutase family protein             | Metabolic process       | Catalytic activity           | Cytoplasm               |

|                            |                |                                                    |                                          |                                 |           |
|----------------------------|----------------|----------------------------------------------------|------------------------------------------|---------------------------------|-----------|
| menC PPA0902<br>cbac_04915 | WP_002515608.1 | o-succinylbenzoate synthase                        | Biosynthetic process                     | Synthase activity               | Cytoplasm |
| cmk<br>HMPREF0675_4273     | WP_002516760.1 | Cytidylate kinase                                  | Metabolic process                        | Kinase activity                 | Cytoplasm |
| metK<br>HMPREF0675_4255    | WP_002517758.1 | S-adenosylmethionine synthase                      | Metabolic process                        | Binding                         | Cytoplasm |
| cbac_03780                 | WP_002530937.1 | Exo-alpha-sialidase                                | Lipid metabolism                         | Sialidase activity              | Cytoplasm |
| PPA1781 cbac_09695         | WP_002514786.1 | 8-oxo-dGTP diphosphatase                           | DNA repair                               | Hydrolase activity              | Cytoplasm |
| PPA1544 cbac_08415         | WP_002514359.1 | Conserved protein                                  | Protein processing                       | Binding                         | Cytoplasm |
| PPA1950 cbac_10560         | WP_002523392.1 | Cell division protein DedD                         | Metabolic process                        | Deaminase activity              | Membrane  |
| coaD<br>HMPREF9578_02029   | WP_002514272.1 | Phosphopantetheine<br>adenyltransferase            | Biosynthetic process                     | Transferase activity            | Cytoplasm |
| PPA2116 cbac_11450         | WP_002530757.1 | Serine protease                                    | Biosynthetic process                     | Peptidase activity              | Membrane  |
| PPA0443 cbac_02415         | WP_002516675.1 | Cobalamin-binding protein                          | Transport                                | Binding                         | Cytoplasm |
| HMPREF0675_3579            | WP_002517279.1 | Transcriptional regulator, TetR<br>family          | Transcription                            | Molecular function<br>regulator | Nucleoid  |
| HMPREF0675_5283            | WP_002516338.1 | FAD dependent oxidoreductase                       | Metabolic process                        | Oxidoreductase activity         | Cytoplasm |
| PPA1366 cbac_07465         | WP_002516499.1 | FAA hydrolase family protein                       | Metabolic process                        | Catalytic activity              | Cytoplasm |
| manA PPA0008<br>cbac_00045 | WP_002515893.1 | Mannose-6-phosphate isomerase                      | Metabolic process                        | Isomerase activity              | Cytoplasm |
| cbac_06585                 | WP_002516778.1 | HAD family hydrolase                               | Protein processing                       | Hydrolase activity              | Cytoplasm |
| PPA1377 cbac_07530         | WP_002531311.1 | RNA helicase                                       | Unknown                                  | Binding                         | Cytoplasm |
| PPA0603 cbac_03350         | WP_007400924.1 | Putative transcriptional regulator                 | Transcription                            | Molecular function<br>regulator | Unknown   |
| HMPREF0675_5327            | WP_002518141.1 | Transcriptional regulator, MarR<br>family          | Transcription                            | Molecular function<br>regulator | Cytoplasm |
| gyrA PPA0010<br>cbac_00055 | WP_002530866.1 | DNA gyrase subunit A                               | DNA replication                          | Binding                         | Cytoplasm |
| cbac_02560                 | WP_002524726.1 | Sugar phosphate<br>isomerase/epimerase             | Metabolic process                        | Isomerase activity              | Cytoplasm |
| cbac_04330                 | WP_073885323.1 | HtaA domain protein                                | Translation                              | Binding                         | Membrane  |
| PPA1181 cbac_06395         | WP_002516773.1 | Shikimate 5-dehydrogenase                          | Metabolic process                        | Dehydrogenase activity          | Cytoplasm |
| prcB PPA1206<br>cbac_06530 | WP_002516776.1 | 20S proteasome beta-subunit                        | Metabolic process                        | Peptidase activity              | Cytoplasm |
| PPA0947 cbac_05145         | WP_002513775.1 | DNA-binding response regulator                     | Transcription                            | Molecular function<br>regulator | Cytoplasm |
| HMPREF0675_5322            | WP_002516444.1 | Putative 3-methyladenine DNA<br>glycosylase        | DNA replication                          | Binding                         | Nucleoid  |
| HMPREF0675_5322            | WP_002516444.1 | Putative 3-methyladenine DNA<br>glycosylase        | DNA replication                          | Binding                         | Cytoplasm |
| PPA1371 cbac_07495         | WP_002516506.1 | Putative transferase                               | Biosynthetic process                     | Transferase activity            | Unknown   |
| PPA2273 cbac_12370         | WP_002519568.1 | Adenosine deaminase                                | DNA damage                               | Deaminase activity              | Cytoplasm |
| gata cbac_06100            | WP_002531385.1 | Glutamyl-tRNA                                      | Translation                              | Hydrolase activity              | Cytoplasm |
| PPA1631 cbac_08855         | WP_002517011.1 | Thioesterase                                       | Regulation of<br>biological process      | Catalytic activity              | Cytoplasm |
| cbac_10785                 | WP_002530669.1 | ATPase                                             | Energy process                           | Hydrolase activity              | Membrane  |
| PPA1290 cbac_07010         | WP_002531340.1 | 2,3-diaminopropionate biosynthesis<br>protein SbnA | Biosynthetic process                     | Synthase activity               | Cytoplasm |
| fmt<br>HMPREF0675_4257     | WP_002517988.1 | Methionyl-tRNA formyltransferase                   | Translation                              | Transferase activity            | Cytoplasm |
| tmk<br>HMPREF0675_3289     | WP_002517149.1 | Thymidylate kinase                                 | Biosynthetic process                     | Kinase activity                 | Cytoplasm |
| ung PPA0558<br>cbac_03120  | WP_002519227.1 | Uracil-DNA glycosylase                             | DNA repair                               | Glycosylase activity            | Cytoplasm |
| PPA1277 cbac_06910         | WP_002531349.1 | ABC transporter substrate-binding<br>protein       | Transport<br>Pathogenesis<br>(Virulence) | Binding                         | Membrane  |
| cbac_09495                 | WP_041444224.1 | Phosphoesterase                                    |                                          | Hydrolase activity              | Cytoplasm |
| lysA PPA1259<br>cbac_06800 | WP_002516817.1 | Diaminopimelate decarboxylase                      | Biosynthetic process                     | Decarboxylase activity          | Cytoplasm |
| rpoZ<br>HMPREF1162_0201    | WP_002516821.1 | DNA-directed RNA polymerase<br>subunit omega       | Transcription                            | Polymerase activity             | Nucleoid  |
| HMPREF9578_00185           | WP_002516610.1 | ACT domain-containing protein                      | Metabolic process                        | Structural molecule<br>activity | Cytoplasm |
| PPA0563 cbac_03150         | WP_011183699.1 | Conserved protein containing<br>thioredoxin domain | Metabolic process                        | Reductase activity              | Cytoplasm |

|                               |                |                                                         |                                       |                                  |           |
|-------------------------------|----------------|---------------------------------------------------------|---------------------------------------|----------------------------------|-----------|
| cbac_01645                    | WP_002523010.1 | PTS glucose transporter subunit IIB                     | Transport                             | Kinase activity                  | Membrane  |
| PPA0548 cbac_03045            | WP_002516725.1 | Hydrolase, Ppx/GppA phosphatase family                  | Metabolic process                     | Hydrolase activity               | Cytoplasm |
| PPA2167 cbac_11745            | WP_002516352.1 | Allantoate amidohydrolase (AAH, allantoinase)           | Metabolic process                     | Hydrolase activity               | Cytoplasm |
| PPA0814 cbac_04460            | WP_002519094.1 | Putative gluconeogenesis factor                         | Cell wall organization and cell shape | Transferase activity             | Cytoplasm |
| map PPA1833<br>cbac_09965     | WP_002523458.1 | Methionine aminopeptidase                               | Protein processing                    | Peptidase activity               | Cytoplasm |
| mfd cbac_03010                | WP_002518816.1 | Transcription-repair-coupling factor                    | Transcription                         | Binding                          | Cytoplasm |
| PPA1711 cbac_09310            | WP_002522145.1 | Short chain dehydrogenase                               | Lipid metabolism                      | Oxidoreductase activity          | Cytoplasm |
| PPA1048 cbac_05685            | WP_002515631.1 | PglZ domain-containing protein                          | Cellular homeostasis                  | Catalytic activity               | Cytoplasm |
| cbac_01755                    | WP_002518719.1 | Sugar phosphate isomerase/epimerase                     | Metabolic process                     | Isomerase activity               | Cytoplasm |
| cbac_02605                    | WP_002518777.1 | Tat pathway signal protein                              | Transport                             | Translocase activity             | Membrane  |
| cbac_12735                    | WP_002518540.1 | Chromosome partitioning protein ParB                    | DNA replication                       | Binding                          | Cytoplasm |
| dnaA<br>HMPREF0675_3000       | WP_002515747.1 | Chromosomal replication initiator protein DnaA          | DNA replication                       | Binding                          | Cytoplasm |
| rbpA PPA0820<br>cbac_04490    | WP_002513867.1 | RNA polymerase-binding protein RbpA                     | Transcription                         | Binding                          | Unknown   |
| gatB<br>HMPREF0675_4186       | WP_002516598.1 | Aspartyl-/glutamyl-tRNA                                 | Translation                           | Transferase activity             | Cytoplasm |
| pgl PPA1565<br>cbac_08515     | WP_002521397.1 | 6-phosphogluconolactonase                               | Metabolic process                     | Phosphogluconolactonase activity | Unknown   |
| PPA1083 cbac_05885            | WP_002523969.1 | Glycine cleavage system protein H                       | Metabolic process                     | Transferase activity             | Membrane  |
| ligA cbac_08830               | WP_002531030.1 | DNA ligase                                              | DNA repair                            | Ligase activity                  | Cytoplasm |
| ligA cbac_08830               | WP_002531030.1 | DNA ligase                                              | DNA replication                       | Ligase activity                  | Cytoplasm |
| purK PPA1702<br>cbac_09260    | WP_002531235.1 | N5-carboxyaminoimidazole ribonucleotide synthase.       | Biosynthetic process                  | Synthase activity                | Unknown   |
| PPA1031 cbac_05600            | WP_002515632.1 | RNA polymerase principal sigma factor HrdD              | Transcription                         | Binding                          | Cytoplasm |
| whiA<br>HMPREF0675_3880       | WP_002515546.1 | Probable cell division protein WhiA                     | Cell division                         | Binding                          | Cytoplasm |
| cbac_01795                    | WP_002531193.1 | Histidine phosphatase family protein                    | Regulation of biological process      | Isomerase activity               | Cytoplasm |
| cbac_02850                    | WP_002518803.1 | Molybdopterin-guanine dinucleotide biosynthesis protein | Biosynthetic process                  | Binding                          | Cytoplasm |
| trpC PPA1130<br>cbac_06135    | WP_002516614.1 | Indole-3-glycerol phosphate synthase                    | Biosynthetic process                  | Synthase activity                | Cytoplasm |
| cbac_00405                    | WP_002515702.1 | ABC transporter ATP-binding protein                     | Transport                             | Binding                          | Membrane  |
| PPA1364 cbac_07445            | WP_002517908.1 | IclR family transcriptional regulator                   | Transcription                         | Molecular function regulator     | Cytoplasm |
| PPA0655 cbac_03620            | WP_002515176.1 | Antitoxin HicB                                          | Response to stimulus                  | Binding                          | Unknown   |
| PPA0055 cbac_00300            | WP_002515807.1 | DNA-binding response regulator                          | Transcription                         | Molecular function regulator     | Nucleoid  |
| rsmI PPA0524<br>cbac_02910    | WP_002516667.1 | Ribosomal RNA small subunit methyltransferase I         | Response to stimulus                  | Transferase activity             | Cytoplasm |
| PPA1824 cbac_09925            | WP_009640388.1 | Glycosyl transferase                                    | Biosynthetic process                  | Transferase activity             | Cytoplasm |
| PPA2237 cbac_12170            | WP_002516470.1 | 1-acyl-sn-glycerol-3-phosphate acyltransferase          | Biosynthetic process                  | Transferase activity             | Cytoplasm |
| PPA1146 cbac_06210            | WP_011183804.1 | Beta-glucosidase                                        | Metabolic process                     | Hydrolase activity               | Cytoplasm |
| cbac_05620                    | WP_002515456.1 | Alpha/beta hydrolase                                    | Degradation                           | Hydrolase activity               | Membrane  |
| HMPREF0675_5088<br>cbac_06220 | WP_002518085.1 | Phosphomannomutase                                      | Biosynthetic process                  | Hydrolase activity               | Cytoplasm |
| cbac_06220                    | WP_041444150.1 | Permease IIC component                                  | Transport                             | Transferase activity             | Membrane  |
| PPA0082 cbac_00450            | WP_002515718.1 | Hypothetical membrane associated protein                | Transport                             | Transporter activity             | Membrane  |
| rnhA PPA1729<br>cbac_09405    | WP_002531248.1 | Ribonuclease H                                          | Metabolic process                     | Binding                          | Cytoplasm |
| PPA1898 cbac_10295            | WP_002531304.1 | Exodeoxyribonuclease III                                | DNA repair                            | Ribonuclease activity            | Cytoplasm |
| PPA1069 cbac_05795            | WP_002517916.1 | Amino acid permease                                     | Transport                             | Transporter activity             | Membrane  |
| PPA2185 cbac_11850            | WP_002516309.1 | Acyl dehydratase                                        | Metabolic process                     | Isomerase activity               | Cytoplasm |

|                            |                |                                                        |                                       |                                  |           |
|----------------------------|----------------|--------------------------------------------------------|---------------------------------------|----------------------------------|-----------|
| cbac_09895                 | WP_002525147.1 | Glyco_hydro_35 domain-containing protein               | Metabolic process                     | Hydrolase activity               | Cytoplasm |
| cbac_06995                 | WP_002524911.1 | Peptide synthetase                                     | Biosynthetic process                  | Synthase activity                | Cytoplasm |
| uvrB cbac_04410            | WP_002518347.1 | UvrABC system protein B                                | Response to stimulus                  | Binding                          | Cytoplasm |
| PPA1118 cbac_06075         | WP_009640307.1 | Methionine synthase vitamin-B12 independent            | Biosynthetic process                  | Transferase activity             | Cytoplasm |
| rsmG cbac_12765            | WP_002518545.1 | Ribosomal RNA small subunit methyltransferase G        | Translation                           | Transferase activity             | Cytoplasm |
| PPA0120 cbac_00670         | WP_002530833.1 | EXLDI protein                                          | Unknown                               | Unknown                          | Unknown   |
| PPA0624 cbac_03465         | WP_002530925.1 | N-acetyltransferase                                    | Metabolic process                     | Transferase activity             | Cytoplasm |
| PPA1166 cbac_06315         | WP_002517766.1 | Bifunctional                                           | Metabolic process                     | Hydrolase activity               | Cytoplasm |
| PPA2037 cbac_11045         | WP_002514480.1 | MerR family DNA-binding transcriptional regulator      | Transcription                         | Molecular function regulator     | Cytoplasm |
| PPA1186                    | WP_002513526.1 | PPK2 domain-containing protein                         | Metabolic process                     | Kinase activity                  | Cytoplasm |
| PPA1616 cbac_08775         | WP_002517026.1 | DNA helicase                                           | DNA replication                       | Hydrolase activity               | Cytoplasm |
| PPA0348 cbac_01935         | WP_002517076.1 | Conserved protein, putative glycine cleavage T-protein | Metabolic process                     | Unknown                          | Unknown   |
| PPA1488 cbac_08115         | WP_002520231.1 | Arabinose operon protein AraM                          | Biosynthetic process                  | Oxidoreductase activity          | Cytoplasm |
| PPA1524 cbac_08315         | WP_009640297.1 | 6-phosphogluconolactonase                              | Metabolic process                     | Phosphogluconolactonase activity | Cytoplasm |
| cbac_04925                 | WP_002515532.1 | Isochorismate synthase                                 | Biosynthetic process                  | Synthase activity                | Cytoplasm |
| cobO PPA0437<br>cbac_02385 | WP_002515069.1 | Cob                                                    | Biosynthetic process                  | Transferase activity             | Unknown   |
| manA PPA0451<br>cbac_02480 | WP_002517436.1 | Mannose-6-phosphate isomerase                          | Metabolic process                     | Isomerase activity               | Cytoplasm |
| PPA1085 cbac_05895         | WP_002513631.1 | MerR family transcriptional regulator                  | Transcription                         | Molecular function regulator     | Cytoplasm |
| PPA2254 cbac_12250         | WP_002516466.1 | Amino acid permease                                    | Transport                             | Transporter activity             | Membrane  |
| PPA0639 cbac_03540         | WP_002530928.1 | Glycogen synthase                                      | Biosynthetic process                  | Transferase activity             | Cytoplasm |
| PPA0177 cbac_00965         | WP_002530809.1 | APC family permease                                    | Transport                             | Transporter activity             | Membrane  |
| cbac_12740                 | WP_002518541.1 | ParA family protein                                    | Cell division                         | Binding                          | Cytoplasm |
| PPA0685 cbac_03785         | WP_002515306.1 | Sialidase                                              | Metabolic process                     | Sialidase activity               | Cytoplasm |
| cobI PPA0420<br>cbac_02305 | WP_002531167.1 | Precorrin-2 C                                          | Biosynthetic process                  | Transferase activity             | Cytoplasm |
| PPA1464 cbac_07995         | WP_009640171.1 | Methylase                                              | Translation                           | Transferase activity             | Cytoplasm |
| nhaA<br>HMPREF0675_3274    | WP_002524662.1 | Na                                                     | Cellular homeostasis                  | Transporter activity             | Membrane  |
| PPA2031 cbac_11015         | WP_002530684.1 | ABC transporter associated permease                    | Transport                             | Transporter activity             | Membrane  |
| mraY<br>HMPREF9578_00542   | WP_002513927.1 | Phospho-N-acetylmuramoyl-pentapeptide-transferase      | Cell wall organization and cell shape | Transferase activity             | Membrane  |
| HMPREF9578_00411           | WP_002521769.1 | Metallo-beta-lactamase domain protein                  | Regulation of biological process      | Hydrolase activity               | Cytoplasm |
| cbac_03830                 | WP_002523706.1 | Cytochrome c oxidase assembly protein                  | Protein processing                    | Unknown                          | Membrane  |
| PPA1365 cbac_07460         | WP_011183848.1 | CPBP family intramembrane metalloprotease              | Protein processing                    | Peptidase activity               | Membrane  |
| PPA0557 cbac_03110         | WP_002515113.1 | Transporter                                            | Transport                             | Transporter activity             | Membrane  |
| thiL PPA1357<br>cbac_07420 | WP_002515338.1 | Thiamine-monophosphate kinase                          | Biosynthetic process                  | Binding                          | Cytoplasm |
| cbac_11435                 | WP_002530754.1 | Histidine kinase                                       | Regulation of biological process      | Kinase activity                  | Membrane  |
| HMPREF0675_4955            | WP_002515985.1 | Enoyl-CoA hydratase/isomerase family protein           | Unknown                               | Isomerase activity               | Cytoplasm |
| tyrS cbac_07675            | WP_009640057.1 | Tyrosine--tRNA ligase                                  | Translation                           | Ligase activity                  | Cytoplasm |
| thrC<br>HMPREF0675_4320    | WP_002518907.1 | Threonine synthase                                     | Biosynthetic process                  | Synthase activity                | Cytoplasm |
| PPA1258 cbac_06795         | WP_002517921.1 | Homoserine dehydrogenase                               | Biosynthetic process                  | Dehydrogenase activity           | Cytoplasm |
| ddl PPA1359<br>cbac_07430  | WP_002531315.1 | D-alanine--D-alanine ligase                            | Cell wall organization and cell shape | Ligase activity                  | Cytoplasm |
| PPA0109 cbac_00605         | WP_011183602.1 | Myosin-crossreactive antigen                           | Lipid metabolism                      | Binding                          | Cytoplasm |
| cbac_09270                 | WP_002517608.1 | Peptidase E                                            | Metabolic process                     | Peptidase activity               | Cytoplasm |

|                    |                |                                                                                                  |                      |                              |           |
|--------------------|----------------|--------------------------------------------------------------------------------------------------|----------------------|------------------------------|-----------|
| PPA2251 cbac_12235 | WP_002518145.1 | D-glycerate dehydrogenase                                                                        | Metabolic process    | Dehydrogenase activity       | Cytoplasm |
| cbac_10845         | WP_002518064.1 | Dihydrodipicolinate synthase family protein                                                      | Biosynthetic process | Lyase activity               | Cytoplasm |
| PPA1367 cbac_07470 | WP_002516498.1 | Thymidine phosphorylase                                                                          | Metabolic process    | Phosphorylase activity       | Cytoplasm |
| purQ               | WP_002514428.1 | Phosphoribosylformylglycinamide synthase subunit PurQ                                            | Biosynthetic process | Synthase activity            | Cytoplasm |
| HMPREF9578_01524   | WP_002517539.1 | Conserved L-arabinose operon protein, hydrolase                                                  | Transcription        | Hydrolase activity           | Cytoplasm |
| PPA2322 cbac_12635 | WP_002517793.1 | ATP-grasp domain-containing protein                                                              | Energy process       | Binding                      | Cytoplasm |
| PPA1285 cbac_06985 | WP_002516449.1 | AraC family transcriptional regulator                                                            | Transcription        | Molecular function regulator | Cytoplasm |
| PPA2125 cbac_11505 | WP_007401162.1 | Polyphosphate                                                                                    | Transcription        | Kinase activity              | Cytoplasm |
| PPA1905 cbac_10330 | WP_002531307.1 | glucokinase/transcriptional regulator 2-oxoacid:ferredoxin oxidoreductase subunit beta           | Metabolic process    | Catalytic activity           | Cytoplasm |
| cobF PPA1920       | WP_002524506.1 | Precorrin-6A synthase                                                                            | Biosynthetic process | Synthase activity            | Cytoplasm |
| cbac_10410         | WP_002530734.1 | Alpha-ketoacid dehydrogenase subunit beta                                                        | Response to stimulus | Dehydrogenase activity       | Cytoplasm |
| PPA2093 cbac_11320 | WP_002550711.1 | Maleylpyruvate isomerase family                                                                  | Metabolic process    | Isomerase activity           | Cytoplasm |
| murE PPA0753       | WP_002518243.1 | mycothiol-dependent enzyme UDP-N-acetylmuramoyl-L-alanyl-D-glutamate--2,6-diaminopimelate ligase | Biosynthetic process | Ligase activity              | Cytoplasm |
| cbac_04150         | WP_002515101.1 | L-serine dehydratase                                                                             | Metabolic process    | Binding                      | Cytoplasm |
| PPA0396            | WP_002520491.1 | Transcriptional regulator                                                                        | Transcription        | Molecular function regulator | Cytoplasm |
| PPA1067 cbac_05785 | WP_002514720.1 | Biotin carboxylase                                                                               | Lipid metabolism     | Ligase activity              | Cytoplasm |
| PPA1719 cbac_09355 | WP_002516066.1 | 50S ribosomal protein L11                                                                        | Translation          | Structural molecule activity | Ribosome  |
| rpIK               | WP_002517298.1 | Alpha-1,4 glucan phosphorylase                                                                   | Metabolic process    | Phosphorylase activity       | Cytoplasm |
| HMPREF0675_4942    | WP_002517307.1 | Cobalt-precorrin-6A reductase                                                                    | Biosynthetic process | Reductase activity           | Cytoplasm |
| PPA0081 cbac_00440 | WP_002531196.1 | Uroporphyrinogen decarboxylase                                                                   | Biosynthetic process | Decarboxylase activity       | Cytoplasm |
| cbac_02400         | WP_002514249.1 | UPF0109 protein PPA1442                                                                          | Unknown              | Binding                      | Unknown   |
| hemE cbac_01710    | WP_002516303.1 | ABC transporter ATP-binding protein                                                              | Transport            | Transporter activity         | Membrane  |
| PPA1442 cbac_07865 | WP_002517885.1 | CTP synthase                                                                                     | Metabolic process    | Binding                      | Cytoplasm |
| cbac_11690         | WP_002551083.1 | Threonylcarbamoyl-AMP synthase                                                                   | Biosynthetic process | Binding                      | Cytoplasm |
| pyrG               | WP_002521859.1 | Glucokinase                                                                                      | Metabolic process    | Kinase activity              | Cytoplasm |
| HMPREF0675_4439    | WP_002514221.1 | 50S ribosomal protein L20                                                                        | Translation          | Structural molecule activity | Ribosome  |
| cbac_05930         | WP_002516314.1 | 50S ribosomal subunit assembly factor BipA                                                       | Translation          | Binding                      | Ribosome  |
| PPA0722 cbac_03995 | WP_002515744.1 | Glycosyl transferase                                                                             | Biosynthetic process | Transferase activity         | Cytoplasm |
| rpIT               | WP_002530735.1 | Pyruvate dehydrogenase                                                                           | Unknown              | Oxidoreductase activity      | Unknown   |
| HMPREF9578_02089   | WP_007400895.1 | PTS sugar transporter                                                                            | Transport            | Transporter activity         | Membrane  |
| typA bipA PPA2003  | WP_002531412.1 | Carbamoyl-phosphate synthase large chain                                                         | Biosynthetic process | Synthase activity            | Cytoplasm |
| cbac_10865         | WP_002531205.1 | Conserved protein, putative cell division inhibitor                                              | Cell division        | Catalytic activity           | Cytoplasm |
| PPA0131 cbac_00730 | WP_002515854.1 | Glycosyltransferase family 4 protein                                                             | Unknown              | Transferase activity         | Cytoplasm |
| pdhA cbac_11325    | WP_002524945.1 | 30S ribosomal protein S13                                                                        | Translation          | Structural molecule activity | Ribosome  |
| cbac_02450         | WP_002516467.1 | ErfK/YbiS/YcfS/YnhG                                                                              | Biosynthetic process | Transferase activity         | Membrane  |
| carB cbac_05435    | WP_011183789.1 | Conserved protein                                                                                | Unknown              | Binding                      | Unknown   |
| PPA0286 cbac_01600 | WP_002519002.1 | RNA polymerase sigma factor SigA                                                                 | Transcription        | Binding                      | Cytoplasm |
| PPA0147 cbac_00815 | WP_002516980.1 | Energy-dependent translational throttle protein EttA                                             | Translation          | Transferase activity         | Cytoplasm |
| cbac_06440         | WP_002515739.1 | Ribokinase                                                                                       | Metabolic process    | Kinase activity              | Cytoplasm |
| HMPREF0675_5340    | WP_002519222.1 | PhoH family protein                                                                              | Unknown              | Binding                      | Unknown   |
| PPA1056 cbac_05725 | WP_002531443.1 | Hydroxyethylthiazole kinase                                                                      | Biosynthetic process | Binding                      | Cytoplasm |
| sigA cbac_05605    |                |                                                                                                  |                      |                              |           |
| ettA PPA1636       |                |                                                                                                  |                      |                              |           |
| cbac_08880         |                |                                                                                                  |                      |                              |           |
| rbk PPA0018        |                |                                                                                                  |                      |                              |           |
| cbac_00095         |                |                                                                                                  |                      |                              |           |
| cbac_03165         |                |                                                                                                  |                      |                              |           |
| thiM PPA0885       |                |                                                                                                  |                      |                              |           |

|                         |                |                                                                        |                                  |                              |           |
|-------------------------|----------------|------------------------------------------------------------------------|----------------------------------|------------------------------|-----------|
| cbac_03675              | WP_002519174.1 | Glutamine synthetase                                                   | Biosynthetic process             | Ligase activity              | Cytoplasm |
| polA cbac_04270         | WP_002523754.1 | DNA polymerase I                                                       | DNA repair                       | Binding                      | Nucleoid  |
| polA cbac_04270         | WP_002523754.1 | DNA polymerase I                                                       | DNA replication                  | Binding                      | Nucleoid  |
| PPA0945 cbac_05135      | WP_002526277.1 | Putative histidine kinase                                              | Regulation of biological process | Kinase activity              | Membrane  |
| cbac_12525              | WP_002519762.1 | Serine/threonine protein kinase                                        | Regulation of biological process | Kinase activity              | Cytoplasm |
| PPA0281 cbac_01575      | WP_002517113.1 | Conserved membrane spanning protein                                    | Transport                        | Transporter activity         | Membrane  |
| radA PPA0312 cbac_01740 | WP_002517527.1 | DNA repair protein RadA                                                | DNA repair                       | Hydrolase activity           | Cytoplasm |
| PPA0342 cbac_01905      | WP_002517143.1 | Conserved protein                                                      | Unknown                          | Hydrolase activity           | Cytoplasm |
| PPA1639 cbac_08895      | WP_002524831.1 | ABC transporter                                                        | Transport                        | Transporter activity         | Membrane  |
| PPA2096 cbac_11340      | WP_009639878.1 | Molybdenum cofactor biosynthesis enzyme/coproporphyrinogen III oxidase | Biosynthetic process             | Catalytic activity           | Cytoplasm |
| cbac_04120              | WP_002518266.1 | DUF58 domain-containing protein                                        | Unknown                          | Structural molecule activity | Membrane  |
| PPA0710 cbac_03930      | WP_002530941.1 | Cytochrome bc1 complex cytochrome b subunit                            | Unknown                          | Reductase activity           | Membrane  |
| hrcA HMPREF9578_00410   | WP_002513807.1 | Heat-inducible transcription repressor HrcA                            | Response to stimulus             | Binding                      | Cytoplasm |
| PPA0072 cbac_00395      | WP_002525540.1 | Membrane associated protein                                            | Transport                        | Transporter activity         | Membrane  |
| PPA2298 cbac_12500      | WP_002515857.1 | Conserved protein, putative mechanosensitive ion channel               | Transport                        | Transporter activity         | Membrane  |
| PPA0732 cbac_04045      | WP_002513952.1 | Geranylgeranyl pyrophosphate synthase                                  | Biosynthetic process             | Transferase activity         | Cytoplasm |
| PPA1671 cbac_09095      | WP_002522165.1 | Dihydrofolate reductase                                                | Metabolic process                | Reductase activity           | Cytoplasm |
| PPA1917 cbac_10395      | WP_002515372.1 | Hypothetical membrane protein                                          | Transport                        | Transporter activity         | Membrane  |
| PPA0434                 | WP_002517347.1 | ABC transporter ATP-binding protein                                    | Transport                        | Transferase activity         | Membrane  |
| PPA1476 cbac_08060      | WP_002516879.1 | Glycine betaine transport system permease protein                      | Transport                        | Transporter activity         | Membrane  |
| PPA1955 cbac_10590      | WP_002524492.1 | Right-handed parallel beta-helix repeat-containing protein             | Unknown                          | Catalytic activity           | Unknown   |
| cbac_04030              | WP_002521854.1 | Non-specific serine/threonine protein kinase                           | Regulation of biological process | Kinase activity              | Cytoplasm |
| nuoH HMPREF9578_02182   | WP_002514928.1 | NADH-quinone oxidoreductase subunit H                                  | Unknown                          | Oxidoreductase activity      | Membrane  |
| cbac_00710              | WP_002526015.1 | DUF2029 domain-containing protein                                      | Unknown                          | Structural molecule activity | Membrane  |
| PPA0128 cbac_00715      | WP_011183607.1 | Membrane spanning protein                                              | Biosynthetic process             | Transferase activity         | Membrane  |
| PPA2033 cbac_11025      | WP_002530685.1 | Amino acid permease                                                    | Transport                        | Transporter activity         | Membrane  |

**Table S2. List of proteins identified exclusively in *C. acnes*-derived H1 EVs under anaerobic conditions**

| Gene name               | Accession number | Protein name                                      | GO - Biological process          | GO - Molecular function      | GO - Cellular component |
|-------------------------|------------------|---------------------------------------------------|----------------------------------|------------------------------|-------------------------|
| HMPREF9578_00571        | WP_002521853.1   | Ribonuclease                                      | Cellular homeostasis             | Ribonuclease activity        | Cytoplasm               |
| pdxA cbac_01665         | WP_002531202.1   | 4-hydroxythreonine-4-phosphate dehydrogenase PdxA | Biosynthetic process             | Oxidoreductase activity      | Cytoplasm               |
| folE PPA0261 cbac_01480 | WP_002517093.1   | GTP cyclohydrolase 1                              | Metabolic process                | Binding                      | Cytoplasm               |
| PPA0503 cbac_02790      | WP_002518798.1   | Helix-turn-helix domain-containing protein        | Regulation of biological process | Binding                      | Unknown                 |
| mmsA PPA0461 cbac_02540 | WP_002531156.1   | Methylmalonate-semialdehyde dehydrogenase         | Metabolic process                | Dehydrogenase activity       | Cytoplasm               |
| PPA1815 cbac_09865      | WP_002517606.1   | 3-oxoacyl-ACP reductase FabG                      | Lipid metabolism                 | Reductase activity           | Cytoplasm               |
| PPA1609 cbac_08735      | WP_002531040.1   | Conserved phage-associated protein                | Unknown                          | Unknown                      | Unknown                 |
| PPA2063 cbac_11190      | WP_002530709.1   | Peptide ABC transporter substrate-binding protein | Transport                        | Transporter activity         | Membrane                |
| PPA0851 cbac_04650      | WP_002531018.1   | ATP-dependent endonuclease                        | DNA repair                       | Hydrolase activity           | Cytoplasm               |
| PPA0144 cbac_00800      | WP_011183610.1   | DeoR/GlpR transcriptional regulator               | Transcription                    | Molecular function regulator | Nucleoid                |
| PPA1638 cbac_08890      | WP_002531028.1   | ABC transporter                                   | Transport                        | Transporter activity         | Membrane                |
| PPA2091 cbac_11310      | WP_002530732.1   | ABC transporter ATP-binding protein               | Transport                        | Transporter activity         | Membrane                |
| PPA1760 cbac_09575      | WP_002514763.1   | ABC transporter associated permease               | Transport                        | Transporter activity         | Membrane                |
| PPA0399 cbac_02205      | WP_002531171.1   | Sugar ABC transporter                             | Transport                        | Transporter activity         | Membrane                |
| PPA1147 cbac_06215      | WP_002513567.1   | PTS sugar transporter subunit IIB                 | Transport                        | Kinase activity              | Membrane                |
| PPA1915 cbac_10385      | WP_002518040.1   | ABC transporter ATP-binding protein               | Energy process                   | Binding                      | Membrane                |
| cbac_02210              | WP_002517551.1   | Carbohydrate ABC transporter permease             | Transport                        | Transporter activity         | Membrane                |
| PPA0925 cbac_05045      | WP_002513798.1   | Putative two-component system sensor kinase       | Response to stimulus             | Kinase activity              | Membrane                |
| PPA1599 cbac_08685      | WP_007400937.1   | CAAX protease                                     | Protein processing               | Peptidase activity           | Membrane                |
| PPA1389 cbac_07600      | WP_002516495.1   | NUDIX hydrolase                                   | Cellular homeostasis             | Hydrolase activity           | Cytoplasm               |
| PPA1721 cbac_09365      | WP_002522139.1   | Dihydrolypoamide dehydrogenase                    | Cellular homeostasis             | Dehydrogenase activity       | Cytoplasm               |
| iolB PPA0458 cbac_02525 | WP_002531157.1   | 5-deoxy-glucuronate isomerase                     | Metabolic process                | Isomerase activity           | Cytoplasm               |
| PPA0398 cbac_02200      | WP_002520024.1   | Conserved protein, putative sugar-binding protein | Regulation of biological process | Binding                      | Membrane                |
| cbac_10405              | WP_002519594.1   | CoA ester lyase                                   | Unknown                          | Lyase activity               | Unknown                 |
| PPA1529 cbac_08340      | WP_002516971.1   | Conserved protein                                 | Unknown                          | Unknown                      | Membrane                |
| moaC PPA0498 cbac_02765 | WP_007401059.1   | Cyclic pyranopterin monophosphate synthase        | Biosynthetic process             | Synthase activity            | Cytoplasm               |
| menB PPA0907 cbac_04940 | WP_002513816.1   | 1,4-dihydroxy-2-naphthoyl-CoA synthase            | Biosynthetic process             | Synthase activity            | Cytoplasm               |
| PPA1229 cbac_06650      | WP_002517946.1   | ArsR family transcriptional regulator             | Transcription                    | Molecular function regulator | Cytoplasm               |
| PPA1086 cbac_05900      | WP_002517877.1   | Bifunctional nuclease family protein              | Protein processing               | Hydrolase activity           | Nucleoid                |
| PPA2112 cbac_11430      | WP_002530753.1   | DNA-binding response regulator                    | Transcription                    | Binding                      | Nucleoid                |
| PPA1459 cbac_07975      | WP_002514269.1   | Alpha-mannosidase                                 | Metabolic process                | Binding                      | Cytoplasm               |
| PPA1050 cbac_05695      | WP_011183787.1   | Conserved protein                                 | Unknown                          | Unknown                      | Unknown                 |
| PPA0062 cbac_00345      | WP_002530850.1   | Alpha-mannosidase                                 | Metabolic process                | Binding                      | Cytoplasm               |
| aceE cbac_05385         | WP_002525003.1   | Pyruvate dehydrogenase E1 component               | Metabolic process                | Dehydrogenase activity       | Cytoplasm               |
| PPA2267 cbac_12320      | WP_002519750.1   | 6-phosphofructokinase                             | Metabolic process                | Kinase activity              | Cytoplasm               |
| topA PPA0241 cbac_01375 | WP_002529762.1   | DNA topoisomerase 1                               | DNA replication                  | Binding                      | Nucleoid                |
| nadE PPA2266 cbac_12310 | WP_002518158.1   | Glutamine-dependent NAD                           | Biosynthetic process             | Synthase activity            | Cytoplasm               |
| PPA1142 cbac_06190      | WP_002521618.1   | PTS system, sucrose-specific IIBC component       | Transport                        | Transferase activity         | Membrane                |
| cbac_04110              | WP_002530961.1   | DUF3040 domain-containing protein                 | Unknown                          | Unknown                      | Membrane                |
| aroC cbac_06400         | WP_002517990.1   | Chorismate synthase                               | Biosynthetic process             | Synthase activity            | Cytoplasm               |

|                            |                |                                                                |                                  |                               |           |
|----------------------------|----------------|----------------------------------------------------------------|----------------------------------|-------------------------------|-----------|
| cbac_10960                 | WP_002519475.1 | MFS transporter                                                | Transport                        | Transporter activity          | Membrane  |
| gnpA PPA0083<br>cbac_00455 | WP_002530846.1 | 1,3-beta-galactosyl-N-acetylhexosamine phosphorylase           | Metabolic process                | Phosphorylase activity        | Cytoplasm |
| PPA2320 cbac_12625         | WP_002517435.1 | L-arabinose utilization protein, glycerol dehydrogenase        | Lipid metabolism                 | Oxidoreductase activity       | Cytoplasm |
| PPA0290 cbac_01620         | WP_002517197.1 | Putative two-component sensor kinase                           | Response to stimulus             | Structural molecular activity | Membrane  |
| ctaD PPA0702 cbac_03885    | WP_002518277.1 | Cytochrome c oxidase subunit 1                                 | Transport                        | Binding                       | Membrane  |
| PPA2203 cbac_11960         | WP_002518166.1 | Putative Na <sup>+</sup> /H <sup>+</sup> antiporter            | Transport                        | Transporter activity          | Membrane  |
| PPA1315 cbac_07150         | WP_009640225.1 | Exodeoxyribonuclease V gamma chain                             | DNA repair                       | Ribonuclease activity         | Cytoplasm |
| cbac_10755                 | WP_002523368.1 | Pyridine nucleotide-disulfide oxidoreductase                   | Cellular homeostasis             | Oxidoreductase activity       | Nucleoid  |
| PPA1610 cbac_08740         | WP_002531039.1 | Putative transcriptional regulator                             | Transcription                    | Binding                       | Nucleoid  |
| PPA0416 cbac_02280         | WP_011183669.1 | DNA-binding response regulator                                 | Transcription                    | Binding                       | Nucleoid  |
| PPA2216 cbac_12040         | WP_002514161.1 | Acyl-CoA dehydrogenase                                         | Lipid metabolism                 | Dehydrogenase activity        | Cytoplasm |
| PPA1273 cbac_06890         | WP_002516865.1 | ABC transporter ATP-binding protein                            | Transport                        | Transporter activity          | Membrane  |
| cbac_02265                 | WP_002517453.1 | ABC transporter ATP-binding protein                            | Transport                        | Transporter activity          | Membrane  |
| cobA PPA0439<br>cbac_02395 | WP_002517252.1 | Uroporphyrinogen III methylase                                 | Biosynthetic process             | Transferase activity          | Cytoplasm |
| argC HMPREF0675_4395       | WP_002520173.1 | N-acetyl-gamma-glutamyl-phosphate reductase                    | Biosynthetic process             | Reductase activity            | Cytoplasm |
| PPA2088 cbac_11295         | WP_002530729.1 | Esc family protein                                             | Unknown                          | Unknown                       | Membrane  |
| rsmH cbac_04135            | WP_002530963.1 | Ribosomal RNA small subunit methyltransferase H                | Translation                      | Transferase activity          | Cytoplasm |
| PPA1217 cbac_06590         | WP_002518927.1 | 4-hydroxybutyrate coenzyme A transferase                       | Metabolic process                | Transferase activity          | Cytoplasm |
| PPA0141 cbac_00780         | WP_002530823.1 | HPr family phosphocarrier protein                              | Transport                        | Transferase activity          | Cytoplasm |
| PPA2240 cbac_12185         | WP_002530896.1 | Cation-transporting ATPase                                     | Transport                        | Transporter activity          | Membrane  |
| HMPREF0675_5099            | WP_002516194.1 | TrkA C-terminal domain protein                                 | Transport                        | Transporter activity          | Membrane  |
| PPA1732 cbac_09420         | WP_002531250.1 | ABC transporter associated permease                            | Transport                        | Transporter activity          | Membrane  |
| PPA0540 cbac_03005         | WP_002516643.1 | Conserved protein // PrsW family intermembrane metalloprotease | Regulation of biological process | Peptidase activity            | Membrane  |
| PPA0068 cbac_00375         | WP_002519827.1 | Putative two component sensor kinase                           | Response to stimulus             | Kinase activity               | Membrane  |
| PPA1275 cbac_06900         | WP_002516777.1 | ABC transporter permease                                       | Transport                        | Transporter activity          | Membrane  |



**Table S3. List of proteins identified exclusively in *C. acnes*-derived H2 EVs under anaerobic conditions**

| Gene name                    | Accession number | Protein name                                    | GO - Biological Process               | GO - Molecular function       | GO - Cellular component |
|------------------------------|------------------|-------------------------------------------------|---------------------------------------|-------------------------------|-------------------------|
| PPA1345<br>cbac_07350        | WP_002517702.1   | DUF1707 domain-containing protein               | Unknown                               | Unknown                       | Membrane                |
| HMPREF0675_3894              | WP_002515660.1   | Uncharacterized protein                         | Unknown                               | Unknown                       | Membrane                |
| rpsT<br>HMPREF0675_3956      | WP_002515457.1   | 30S ribosomal protein S20                       | Translation                           | Structural molecular activity | Ribosome                |
| PPA0522<br>cbac_02900        | WP_011183691.1   | Nitrate reductase                               | Energy process                        | Transporter activity          | Membrane                |
| PPA0960<br>cbac_05215        | WP_002517830.1   | MsnO8 family LLM class oxidoreductase           | Regulation of biological process      | Oxidoreductase activity       | Membrane                |
| PPA0960<br>cbac_05215        | WP_002517830.1   | MsnO8 family LLM class oxidoreductase           | Response to stimulus                  | Oxidoreductase activity       | Cytoplasm               |
| PPA0724<br>cbac_04005        | WP_002530950.1   | 1-acyl-sn-glycerol-3-phosphate acyltransferase  | Lipid metabolism                      | Transferase activity          | Cytoplasm               |
| hisB<br>HMPREF9578_0015<br>0 | WP_002513559.1   | Imidazoleglycerol-phosphate dehydratase         | Byosynthetic process                  | Lyase activity                | Cytoplasm               |
| kup cbac_11865               | WP_002519550.1   | Probable potassium transport system protein kup | Transport                             | Transporter activity          | Membrane                |
| uppP<br>HMPREF0675_5297      | WP_002516473.1   | Undecaprenyl-diphosphatase                      | Cell wall organization and cell shape | Phosphatase activity          | Membrane                |
| PPA0619<br>cbac_03440        | WP_002530923.1   | Allantoin permease                              | Transport                             | Transporter activity          | Membrane                |

**Table S4. List of primer sequences used for RT-qPCR**

| Genes            |     | Primers (From 5' to 3')     |
|------------------|-----|-----------------------------|
| CREBBP           | FWD | 5' GAGAGCAAGCAAACGGAGAG     |
|                  | RV  | 5' AAGGGAGGCAAACAGGACA      |
| TNF $\alpha$ SEB | FWD | 5' CCAGGGACCTCTCTCTAATCA    |
|                  | RV  | 5' TCAGCTTGAGGGTTTGCTAC     |
| IL-6 SEB         | FWD | 5' ACTCACCTCTTCAGAACGAATTG  |
|                  | RV  | 5' AGCCATCTTTGGAAGGTTTCAG   |
| IL-8 SEB         | FWD | 5' CTTGGCAGCCTTCTGATTT      |
|                  | RV  | 5' GGGTGAAAGGTTTGGAGTATG    |
| PLIN 2           | FWD | 5' TCAGCTCCATTCTACTGTTCCACC |
|                  | RV  | 5' CCTGAATTTTCTGATTGGCACT   |
| TGF $\beta$ 1    | FWD | 5' TACCTGAACCCGTTGCTCTC     |
|                  | RV  | 5' GTTGCTGAGGTATCGCCAGGAA   |
| COX-2            | FWD | 5' GAATCATTACCAGGCAAATTG    |
|                  | RV  | 5' TCTGTAAGCGGGTGAACA       |
| OCLN             | FWD | 5' GTCATCCAGGCCTTTGAAA      |
|                  | RV  | 5' GGTGATAATGATTCCGTTTG     |
| MMP2             | FWD | 5' AGCGAGTGGATGCCGCCTT      |
|                  | RV  | 5' CATTCCAGGCATCTGCGAT      |
| CLDN1            | FWD | 5' GTCTTTGACTCCTTGTGAATCTG  |
|                  | RV  | 5' CACCTCATCGTCTTCCAAGCAC   |
| IL-10            | FWD | 5' TCTCCGAGATGCCTTCAGCAGA   |
|                  | RV  | 5' TCAGACAAGGCTTGGCAACCCA   |

(A) HaCaT

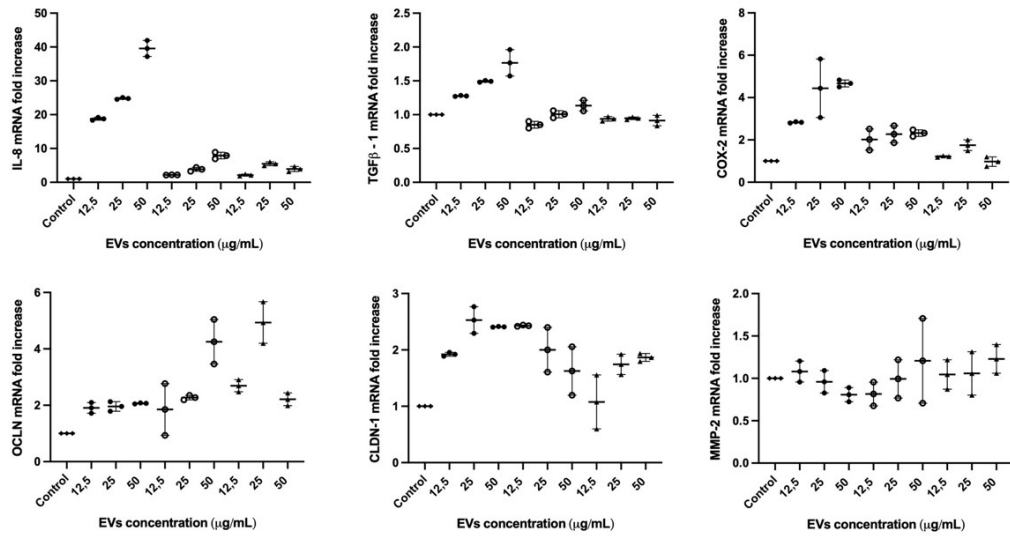

(B) Jurkat

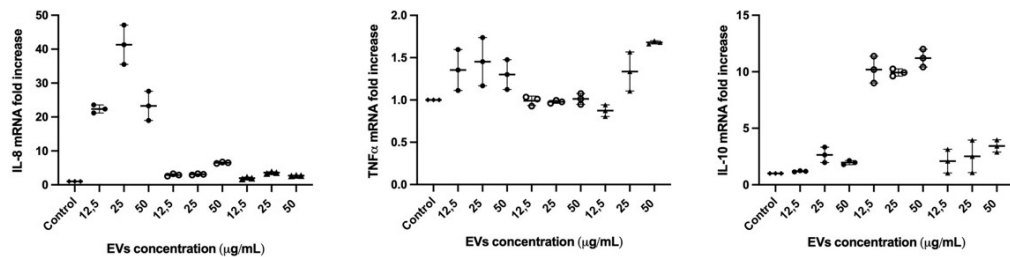

(C) SZ95

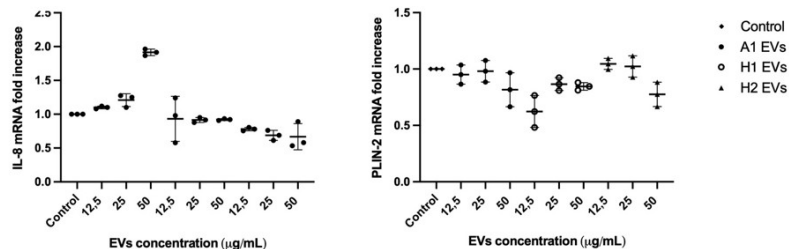

**Figure S1. *In vitro* analysis with direct incubation of *C. acnes* EVs.** Human cells were treated for 24h with different concentrations (12.5, 25 and 50 µg/mL) of *C. acnes* A1, H1 and H2 EVs. Total RNA was extracted, and different biomarkers were assessed by RT-qPCR. (A) HaCaT (B) SZ95 and (C) Jurkat immortalized cell lines. All data are presented as individual dots of experimental replicates ± standard deviation (SD) of triplicate measurements (\* $p \leq 0.05$ , \*\* $p \leq 0.001$  versus non-stimulated controls).

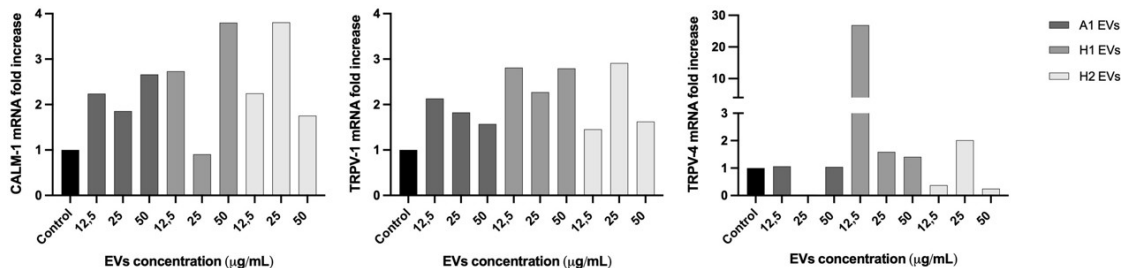

**Figure S2.** *In vitro* analysis with direct incubation of *C. acnes* EVs with CALM-1, TRPV-1, and TRPV-4 biomarkers. HaCaT cells were treated for 24h with different concentrations (12.5, 25 and 50 µg/mL) of *C. acnes* A1, H1 and H2 EVs. Total RNA was extracted, and different biomarkers were assessed by RT-qPCR.

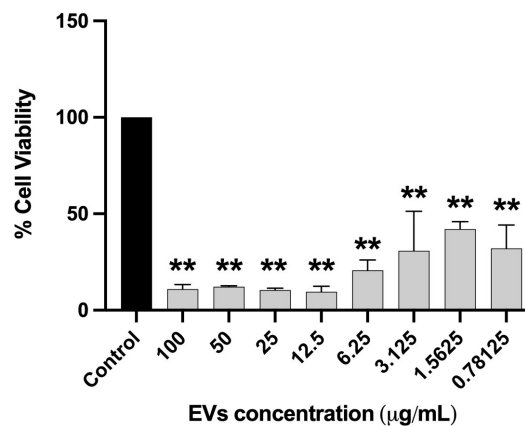

**Figure S3.** Cell viability assay of HaCaT cells incubated with ExoGAG. Different concentrations of pure ExoGAG (IDIS Nasasbiotech) were tested in an *in vitro* skin model of HaCaT cells to study the tolerance of this product as an alternative method to precipitate and isolate EVs. All data are presented as mean  $\pm$  standard deviation (SD) of triplicate measurements (\*\* $p \leq 0.001$  versus non-stimulated controls).

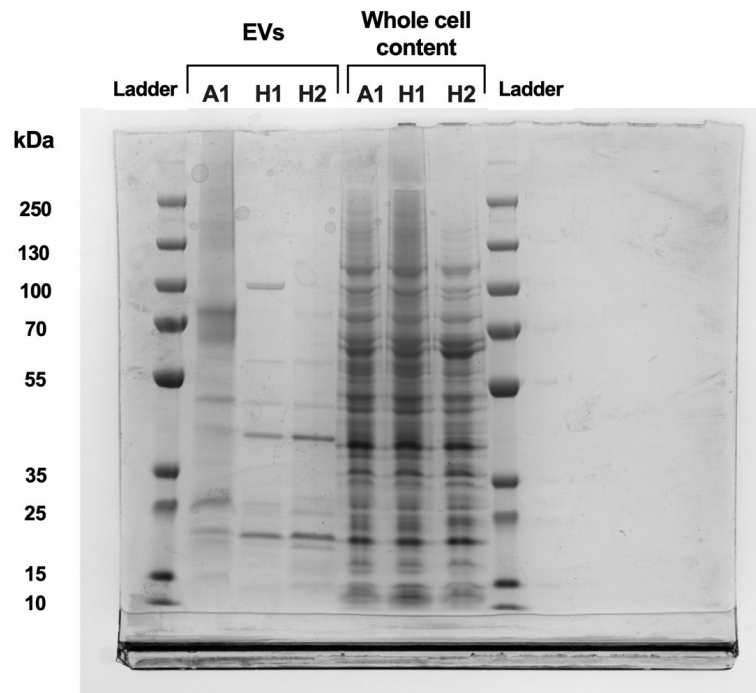

**Figure S4. SDS Gel.** Protein profile of *C. acnes* A1, H1 and H2. Both EVs and whole cell content fractions are represented.
